# Supplementary material for: Pressure behaviors and isothermal kinetics of magnesiothermic reduction of titanium tetrachloride in a semi-batch reactor
Source: Research Square preprint supplement (doi:10.21203/rs.3.rs-2340336/v1), 2023-06-26
Supplement: Supplementary file 1 [file f253e38faf75dcb1d2dc9c2a.docx]

**Supplementary material for:**

**Pressure behaviors and isothermal kinetics of magnesiothermic reduction of titanium tetrachloride in a semi-batch reactor**

***Content***

**pS-2~S-3:**

**S1.** Independent reaction near the gas-liquid interfaces of magnesiothermic reduction of TiCl4

**pS-4~S-9:**

**S2.** Experiment of gaseous component near the gas-liquid interfaces of magnesiothermic reduction of TiCl4

S2.1 Feedstocks and reactants

S2.2 Method

S2.3 Experimental reactor and out-gassing operation

S2.4 Experimental results

**pS-10:**

**S3.** Quality of Ti sponge product

**S1. Independent reaction near the gas-liquid interfaces of magnesiothermic reduction of TiCl4**

There are eight different chemical species (six different chemicals) that are considered to present in this closed reacting system. And the possible chemical reactions and phase changes of magnesiothermic reduction of TiCl4 are listed in Table S1.

**Table S1** Possible chemical reactions and phase changes of magnesiothermic reduction of TiCl4.

| NO. | Reaction | Phase Number | |
| --- | --- | --- | --- |
| Pure Specie | Mg and TiCl2 Dissolved in MgCl2 |
| S1 | TiCl4(g)+2Mg(l)=Ti(s)+2MgCl2(l) | 4 | 3 |
| S2 | 2TiCl4(g)+Mg(l)=2TiCl3(g)+MgCl2(l) | 3 | 2 |
| S3 | TiCl4(g)+Mg(l)=TiCl2(s)+MgCl2(l) | 4 | 2 |
| S4 | TiCl3(g)+1.5Mg(l)=Ti(s)+1.5MgCl2(l) | 4 | 3 |
| S5 | 2TiCl3(g)+Mg(l)=2TiCl2(s)+MgCl2(l) | 4 | 2 |
| S6 | TiCl2(s)+Mg(l)=Ti(s)+MgCl2(l) | 4 | 2 |
| S7 | TiCl4(g)+2Mg(g)=Ti(s)+2MgCl2(g) | 2 | 2 |
| S8 | 2TiCl4(g)+Mg(g)=2TiCl3(g)+MgCl2(g) | 1 | 1 |
| S9 | TiCl4(g)+Mg(g)=TiCl2(s)+MgCl2(l) | 3 | 2 |
| S10 | TiCl3(g)+1.5Mg(g)=Ti(s)+1.5MgCl2(l) | 3 | 3 |
| S11 | 2TiCl3(g)+Mg(g)=2TiCl2(s)+MgCl2(l) | 3 | 2 |
| S12 | TiCl2(s)+Mg(g)=Ti(s)+MgCl2(l) | 4 | 3 |
| S13 | TiCl4(g)+TiCl2(s)=2TiCl3(g) | 2 | 2 |
| S14 | 3TiCl4(g)+Ti(s)=4TiCl3(g) | 2 | 2 |
| S15 | 2TiCl3(g)+Ti(s)=3TiCl2(s) | 3 | 3 |
| S16 | TiCl4(g)+Ti(s)=2TiCl2(s) | 3 | 3 |
| S17 | Mg(l)=Mg(g) | 2 | 2 |
| S18 | MgCl2(l)=MgCl2(g) | 2 | 2 |

The possible reactions of magnesiothermic reduction of TiCl4 near the gas-liquid interface could be presented as a set of atom-balance equations, one for each possible reaction:

(for *i*=1, 2, ···, 8 and *j*=1, 2, ···, *m*) (S-1)

where *υji* is the coefficient of the chemical species *Ji* in the possible reaction *j* (positive for reactants and negative for products). In vector-matrix notation, Eq. (S-1) may be rewritten as:

(S-2)

where **υ** is the stoichiometric coefficients matrix, and **J** is the chemical species matrix would be expressed as a specified formula matrix:

(S-3)

where **ε** is the atomic coefficient matrix, and *εki* is the subscript to element Γ*k* in the chemical species *i*. The matrix **ε**, **J**, and **Γ** are listed in Table S2.

**Table S2** Matrix **ε**, **J** and **Γ**: Atomic Distribution of the Elements.

| Element/  Species | | **J** | | | | | | | |
| --- | --- | --- | --- | --- | --- | --- | --- | --- | --- |
| TiCl4 (g*a*) | TiCl3 (g) | TiCl2 (s*b*) | Ti (s) | Mg (l*c*) | Mg (g) | MgCl2 (l) | MgCl2 (g) |
| **Γ** | Γ1=Ti | 1 | 1 | 1 | 1 | 0 | 0 | 0 | 0 |
| Γ2=Cl | 4 | 3 | 2 | 0 | 0 | 0 | 2 | 2 |
| Γ3=Mg | 0 | 0 | 0 | 0 | 1 | 1 | 1 | 1 |

*a* g: Gas; *b* s: Solid; *c* l: Liquid.

**S2. Experiment of gaseous component near the gas-liquid interfaces of magnesiothermic reduction of TiCl4**

**S2.1 Feedstocks and reactants**

The feedstocks in the experiment of gaseous components near the gas-liquid interfaces are simplified to only consist of two species, TiCl4 and Mg, and the impurities are not considered. And the quality of the reactants should meet the requirements of Chinese standards, YS/T 655-2016 for titanium tetrachloride (Ministry of Industry and Information Technology of China, 2019) and GB/T 3499-2011 for magnesium ingots (State Administration for Market Regulation and Regulation, Standardization Administration, 2011). The chemical properties of reactants are presented in Table S3 and Table S4.

**Table S3** Details of titanium tetrachloride in YS/T 655-2016.

| Reactant | Chemicals, % | | | | | | Chroma |
| --- | --- | --- | --- | --- | --- | --- | --- |
| Purity≥ | Impurity≤ | | | | |
| TiCl4 | SiCl4 | FeCl3 | VOCl3 | AlCl3 | Others |
| Liquid TiCl4 | 99.98 | 0.005 | 0.0010 | 0.0010 | 0.005 | Balance | 5 mgK2Cr2O7/L |

**Table S4** Details of magnesium ingots in GB/T 3499-2011.

| Reactant | Chemicals, % | | | | | | | | | | | |
| --- | --- | --- | --- | --- | --- | --- | --- | --- | --- | --- | --- | --- |
| Purity≥ | Impurity≤ | | | | | | | | | | |
| Mg | Fe | Si | Ni | Cu | Al | Mn | Ti | Pb | Sn | Zn | Others |
| Mg Ingots | 99.98 | 0.002 | 0.003 | 0.0005 | 0.0005 | 0.004 | 0.002 | 0.001 | 0.001 | 0.004 | 0.004 | — |

**S2.2 Method**

There are four species, gaseous TiCl4, gaseous Mg, gaseous TiCl3, and gaseous MgCl2, in the gas phase near the gas-liquid interfaces of magnesiothermic reduction of TiCl4. And homogenize the gas samples, that obtained from the out-gassing operation, and the air in the circumstances fully. The following mathematical relationships bridge the molar fraction of gaseous components the mass fraction of the elements:

(S-4)

(S-5)

(S-6)

(S-7)

(S-8)

(S-9)

(S-10)

(S-11)

(S-12)

(S-13)

(S-14)

(S-15)

(S-16)

(S-17)

where *w* is the mass fraction of the elements and *x* is the molar fraction of the gaseous components in the gas phase near the gas-liquid interfaces.

**S2.3. Experimental reactor and out-gassing operation**

**
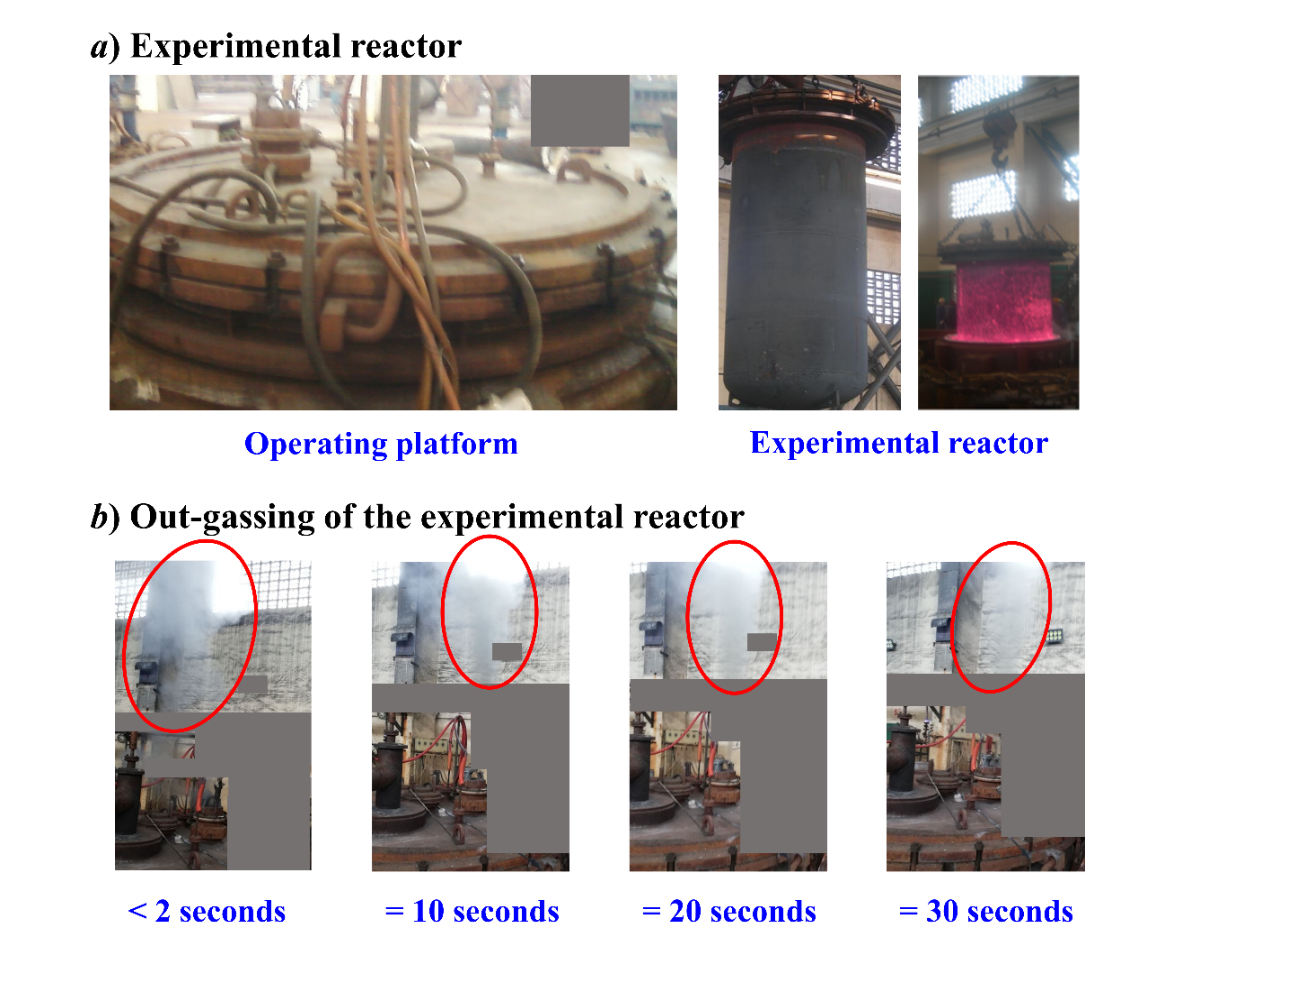
**

**Fig. S1.** Reactor and out-gassing of the gaseous component experiment.

**S2.4 Experimental results**

**Table S5** Parameters of the out-gassing time points and components of gas samples.

| NO. | Experimental Parameters | | |  | Mass Fraction of Element, % | | | |  | Molar Fraction of Component, % | | | |
| --- | --- | --- | --- | --- | --- | --- | --- | --- | --- | --- | --- | --- | --- |
| Temperature  *T*in/℃ | Gauge Pressure  Δ*p*/kPa | Feeding Rate of TiCl4  *q*m/kg·m-2·h-1 |  | *w*(Ti) | *w*(Cl) | *w*(Mg) | *w*(O) |  | *x*(TiCl4) | *x*(TiCl3) | *x*(Mg) | *x*(MgCl2) |
| 1 | 1085.0 | 11.06 | 128.32 |  | 9.57 | 53.01 | 22.67 | 14.75 |  | 6.34 | 11.30 | 46.09 | 36.27 |
| 2 | 1048.0 | 9.85 | 121.20 |  | 10.19 | 52.80 | 21.93 | 15.08 |  | 7.00 | 12.07 | 46.36 | 34.57 |
| 3 | 1107.0 | 9.39 | 129.09 |  | 10.17 | 52.36 | 22.17 | 15.30 |  | 6.79 | 12.09 | 47.25 | 33.86 |
| 4 | 1067.0 | 11.03 | 115.55 |  | 11.35 | 54.59 | 19.55 | 14.52 |  | 8.16 | 14.59 | 41.63 | 35.62 |
| 5 | 1119.0 | 10.51 | 101.79 |  | 13.63 | 56.91 | 15.41 | 14.04 |  | 10.65 | 20.33 | 33.58 | 35.45 |
| 6 | 1078.0 | 13.61 | 115.00 |  | 11.16 | 55.54 | 19.34 | 13.95 |  | 8.30 | 14.34 | 39.45 | 37.90 |
| 7 | 1082.0 | 14.29 | 107.40 |  | 12.24 | 56.30 | 17.55 | 13.91 |  | 9.34 | 16.80 | 36.64 | 37.21 |
| 8 | 1116.0 | 11.16 | 101.86 |  | 13.66 | 57.07 | 15.29 | 13.97 |  | 10.92 | 20.27 | 33.15 | 35.67 |
| 9 | 1089.0 | 14.32 | 120.96 |  | 10.34 | 54.82 | 20.79 | 14.05 |  | 7.35 | 12.80 | 41.67 | 38.18 |
| 10 | 1083.0 | 13.87 | 123.50 |  | 10.00 | 54.47 | 21.41 | 14.12 |  | 6.88 | 12.28 | 42.63 | 38.21 |
| 11 | 1088.0 | 10.27 | 102.81 |  | 13.25 | 56.38 | 16.17 | 14.21 |  | 10.33 | 19.03 | 35.54 | 35.10 |
| 12 | 1098.0 | 13.40 | 118.03 |  | 11.05 | 55.09 | 19.71 | 14.14 |  | 7.81 | 14.34 | 40.51 | 37.35 |
| 13 | 1121.0 | 14.34 | 100.56 |  | 13.18 | 58.05 | 15.47 | 13.30 |  | 10.77 | 19.41 | 30.79 | 39.03 |
| 14 | 1087.0 | 13.46 | 108.59 |  | 12.16 | 56.32 | 17.66 | 13.86 |  | 9.15 | 16.74 | 36.61 | 37.51 |
| 15 | 1080.0 | 9.74 | 127.34 |  | 9.86 | 52.61 | 22.47 | 15.07 |  | 6.73 | 11.48 | 46.91 | 34.89 |
| 16 | 1070.0 | 12.91 | 118.11 |  | 10.82 | 54.61 | 20.25 | 14.33 |  | 7.70 | 13.63 | 41.89 | 36.78 |
| 17 | 1082.0 | 11.14 | 115.72 |  | 11.48 | 54.51 | 19.41 | 14.60 |  | 8.16 | 14.93 | 41.68 | 35.23 |
| 18 | 1128.0 | 12.25 | 116.67 |  | 11.67 | 55.77 | 18.56 | 14.00 |  | 8.62 | 15.57 | 38.44 | 37.37 |
| 19 | 1068.0 | 10.22 | 106.26 |  | 12.62 | 55.85 | 17.26 | 14.27 |  | 9.47 | 17.58 | 37.47 | 35.48 |
| 20 | 1084.0 | 10.69 | 113.58 |  | 11.77 | 54.98 | 18.79 | 14.46 |  | 8.85 | 15.26 | 40.48 | 35.41 |
| 21 | 1087.0 | 9.11 | 118.19 |  | 11.33 | 54.21 | 19.75 | 14.71 |  | 8.09 | 14.45 | 42.54 | 34.91 |
| 22 | 1104.0 | 11.49 | 134.54 |  | 8.80 | 52.25 | 24.05 | 14.90 |  | 5.85 | 9.81 | 48.05 | 36.30 |
| 23 | 1054.0 | 11.50 | 102.90 |  | 12.50 | 56.00 | 17.34 | 14.15 |  | 9.49 | 17.29 | 37.21 | 36.02 |
| 24 | 1095.0 | 9.52 | 129.35 |  | 9.82 | 52.06 | 22.78 | 15.34 |  | 6.51 | 11.43 | 48.03 | 34.02 |
| 25 | 1107.0 | 10.09 | 118.59 |  | 11.38 | 54.61 | 19.50 | 14.51 |  | 8.16 | 14.69 | 41.54 | 35.61 |
| 26 | 1096.0 | 13.21 | 115.55 |  | 11.59 | 55.26 | 18.91 | 14.24 |  | 8.39 | 15.33 | 39.77 | 36.51 |
| 27 | 1132.0 | 9.02 | 100.03 |  | 13.95 | 57.43 | 14.73 | 13.89 |  | 11.56 | 20.89 | 31.87 | 35.68 |
| 28 | 1073.0 | 13.67 | 107.09 |  | 12.09 | 56.24 | 17.78 | 13.89 |  | 9.02 | 16.63 | 36.87 | 37.49 |
| 29 | 1094.0 | 11.97 | 104.66 |  | 12.80 | 56.88 | 16.54 | 13.78 |  | 9.86 | 18.32 | 34.49 | 37.33 |
| 30 | 1049.0 | 13.99 | 115.96 |  | 10.60 | 54.95 | 20.38 | 14.07 |  | 7.52 | 13.36 | 41.18 | 37.94 |

*a* Relative standard temperature uncertainty is less than *u*r(*T*in)=0.00125 (*k*=1);

*b* Relative standard pressure uncertainty is less than *u*r(Δ*p*)=0.005 (*k*=1);

*c* Relative standard feeding rate of TiCl4 uncertainty is less than *u*r(*q*m)=0.035 (*k*=1);

*d* Ambient pressure *pa*=92.26 kPa.


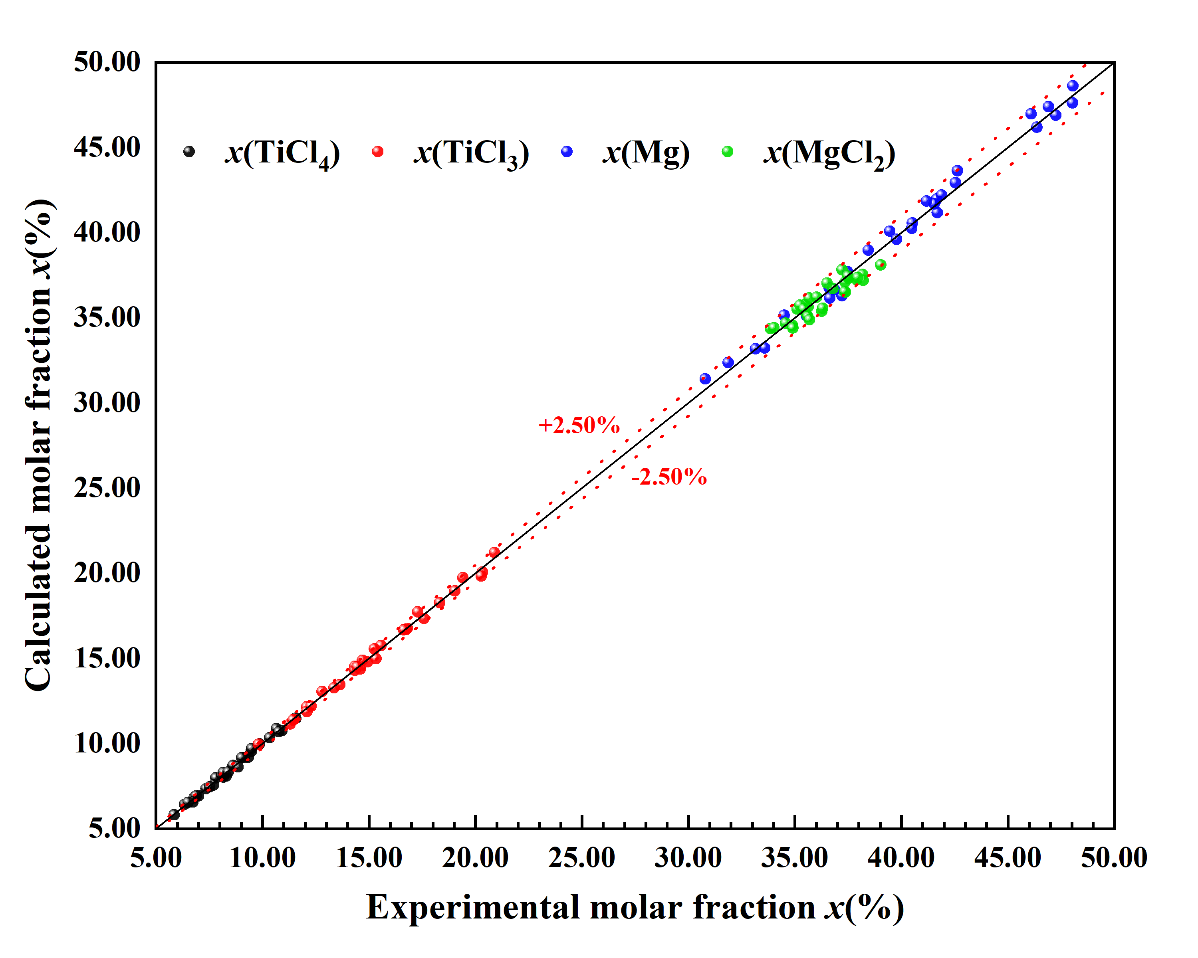


**Fig. S2.** Comparison between experimental molar fraction and calculated molar fraction of the gaseous component near the gas-liquid interfaces.

The results in Fig. S2 indicate that the molar fractions of the gaseous components near the gas-liquid interfaces could be the functions of the temperature *T*in in the unit of K, gauge pressure Δ*p* in the unit of kPa, and the feeding rate of TiCl4 *q*m in the unit of kg·m-2·h-1. And

(S-18)

(S-19)

(S-20)

(S-21)

**S3. Quality of Ti product**

The kinetic experiments are carried out on a prototype Kroll reduction reactor, while the quality of Ti sponge product can meet the requirements of the Chinese standards, GB/T 2524-2019 for Ti sponge (State Administration for Market Regulation and Standardization Administration, 2019). The main element analysis of Ti sponge product is obtained in percentage by ICP-ASE, and the details of Ti sponge product could be found in Table S6.

**Table S6** Details of titanium sponge in GB/T 2524-2019.

| Brand | Chemicals, % | | | | | | | | | | | | | Product Percentage (%) |
| --- | --- | --- | --- | --- | --- | --- | --- | --- | --- | --- | --- | --- | --- | --- |
| Purity≥ | Impurity≤ | | | | | | | | | | | |
| Ti | Fe | Si | Cl | C | N | O | Mn | Mg | H | Ni | Cr | Others |
| MHT-95, MHT-100 | 99.7 | 0.04 | 0.01 | 0.06 | 0.20 | 0.01 | 0.06 | 0.01 | 0.02 | 0.003 | 0.02 | 0.02 | 0.02 | 55.06 |
| MHT-110 | 99.6 | 0.07 | 0.02 | 0.08 | 0.02 | 0.02 | 0.08 | 0.01 | 0.03 | 0.005 | 0.03 | 0.03 | 0.03 | 31.60 |
| Mht-125 | 99.4 | 0.10 | 0.02 | 0.10 | 0.03 | 0.03 | 0.10 | 0.02 | 0.01 | 0.005 | 0.05 | 0.05 | 0.05 | 13.34 |

**References**

Ministry of Industry and Information Technology of China, 2016. Titanium tetrachloride. https://hbba.sacinfo.org.cn/stdDetail/97d9063e42ae3f82764f164cb8fc5280.

State Administration for Market Regulation, Standardization Administration, 2011. Magnesium Ingots. https://openstd.samr.gov.cn/bzgk/gb/newGbInfo?hcno=4C3816A5D3559B0DD4981B47D3A11E9B

State Administration for Market Regulation, Standardization Administration, 2019. Titanium Sponge. http://c.gb688.cn/bzgk/gb/showGb?type=online&hcno=50E68BAFD235A21C7FBD0F84B6963E42
